# Supplementary material for: Magnetite nanoparticles facilitate methane production from ethanol via acting as electron acceptors
Source: PubMed Central journal article supplement (PMC4642290; doi:10.1038/srep16118), 2015-11-12
Supplement: srep16118-s1.pdf [file srep16118-s1.pdf]

# Magnetite nanoparticles facilitate methane production from ethanol via acting as electron acceptors

Zhiman Yang, Xiaoshuang Shi, Chuanshui Wang, Lin Wang, Rongbo Guo\*  
Key Laboratory of Biofuels, Qingdao Institute of Bioenergy and Bioprocess  
Technology, Chinese Academy of Sciences, Qingdao 266101, China.  
\* Corresponding author: [guorb@qibebt.ac.cn](mailto:guorb@qibebt.ac.cn), Tel. & fax: +86 532 80662708

## Supplementary information

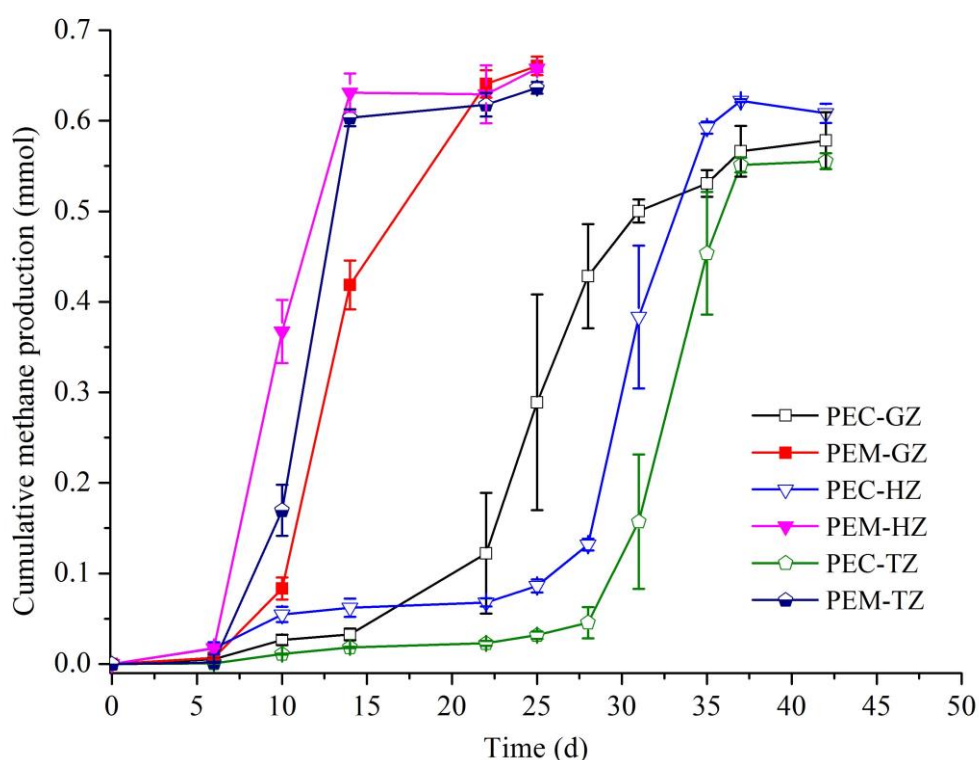

**Supplementary Figure S1. Methane production in the batch cultivation using different paddy soils as inocula.** Three paddy soil samples were used to select the best enrichments degrading ethanol in the presence of magnetite nanoparticles. CH<sub>4</sub> periodically analyzed by GC. PEM-HZ showed the best methane production performance in terms of methane production rate and lag-phase time.

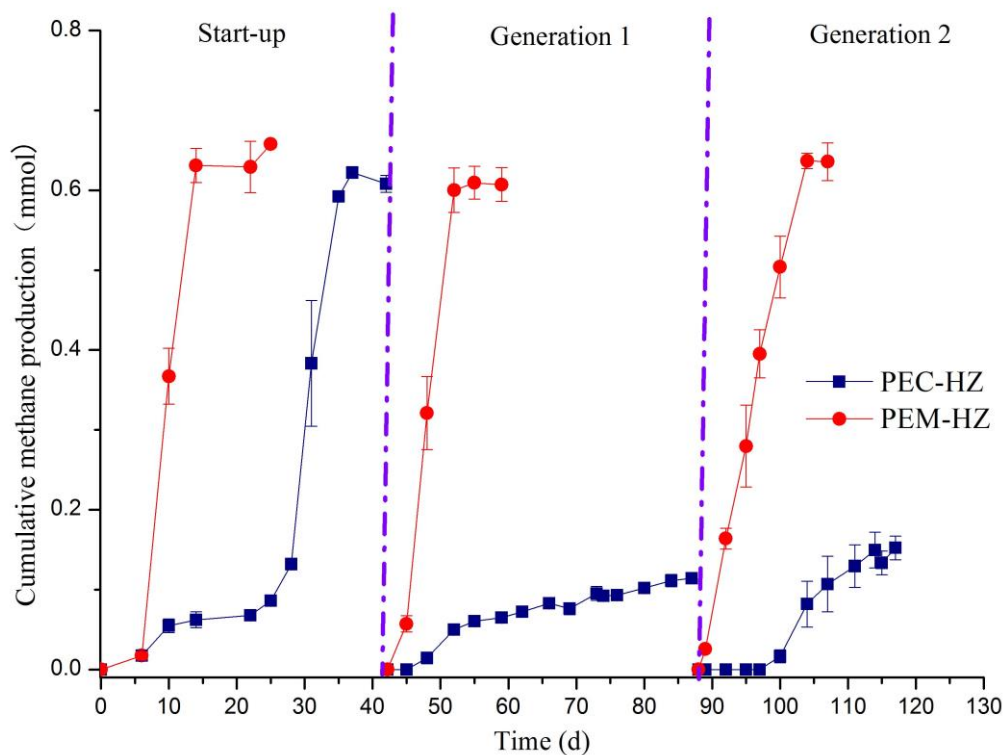

**Supplementary Figure S2. Profiles of methane production in the semi-continuous enrichment cultivation.** At the start-up stage, 1.5 g-VS of paddy soil (HZ) was amended to 20 mL of sterile medium containing 20 mM of magnetite. When the methane production reached to a plateau, subculture was initiated. 5 mL of the paddy soil enrichments were added in fresh medium same to that used for start-up. Two generations of transfers were conducted. As for the PEC-HZ, the same procedures were performed without magnetite addition. CH<sub>4</sub> was periodically analyzed by GC.

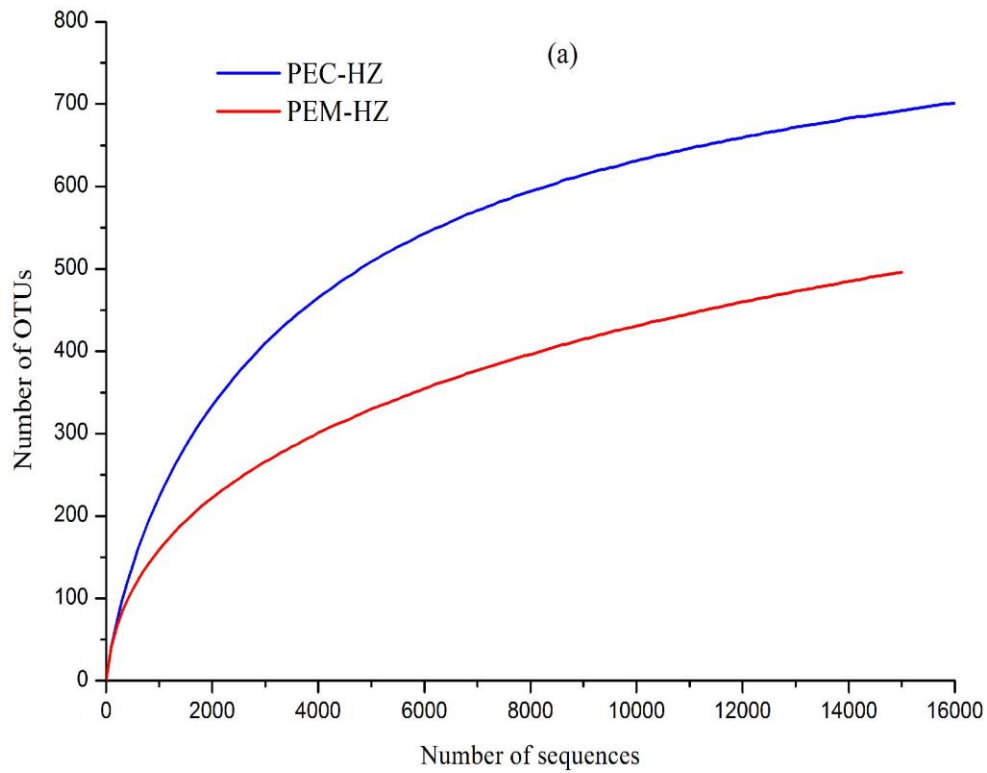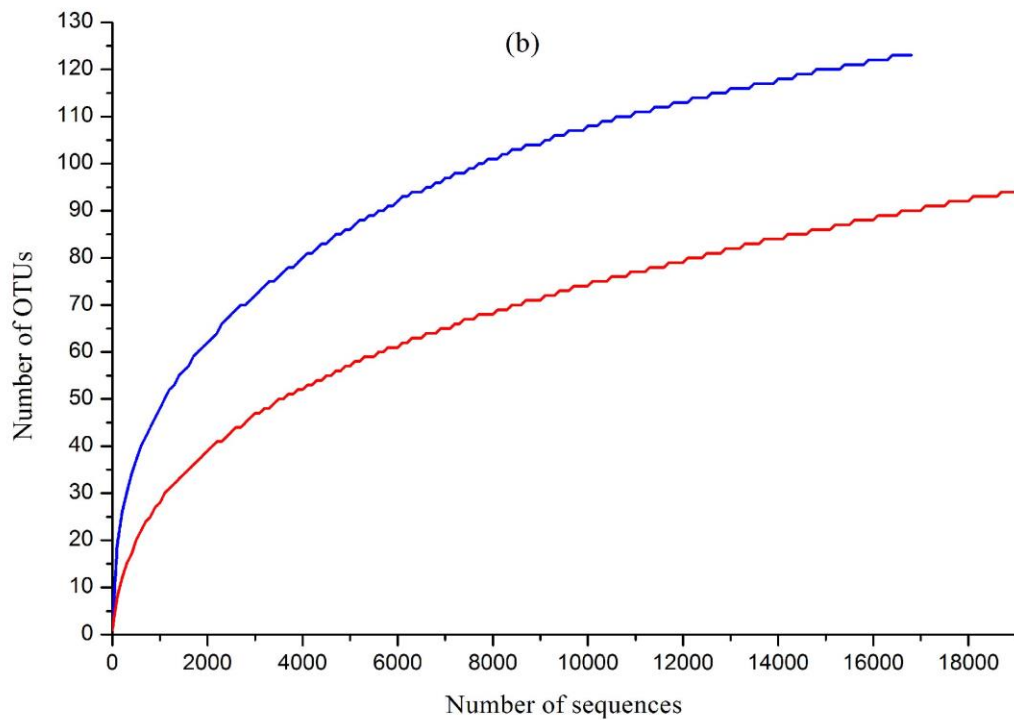

**Supplementary Figure S3. Rarefaction curves for both bacteria and archaea communities.** The paddy soil enrichments (HZ) obtained from the second generation of subculture were used to analyze the microbial community. The OTUs were defined by 0.03 distance irrespective of the non-specific amplification sequences. (a): Bacteria; and (b) Archaea

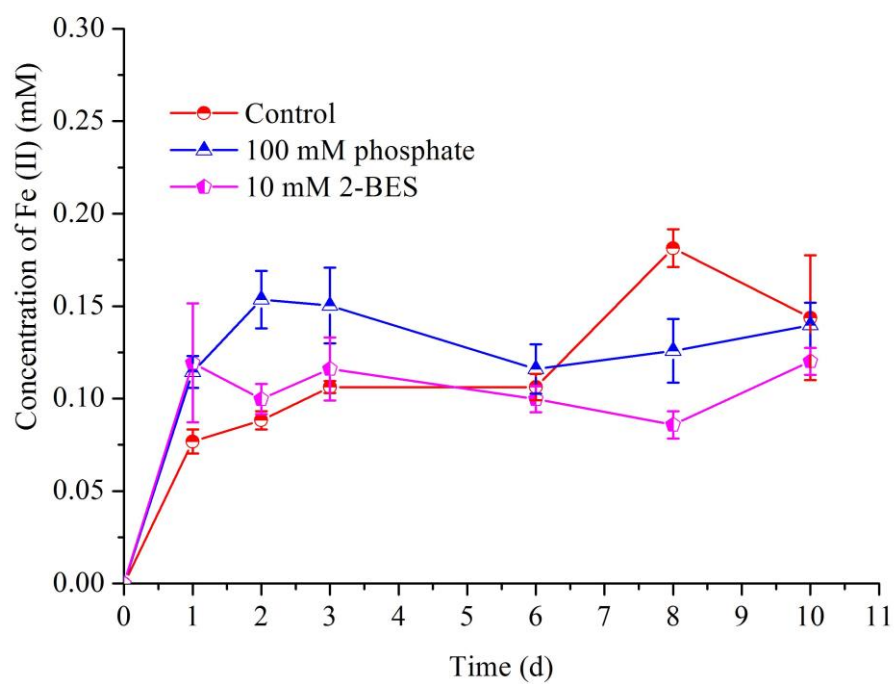

**Supplementary Figure S4. Time course of Fe<sup>2+</sup> concentration in the presence of inhibitors.** The concentrations of Fe<sup>2+</sup> were measured using a ferrozine method. The Fe<sup>2+</sup> concentrations throughout the incubations were below 0.2 mM in all experimental groups.

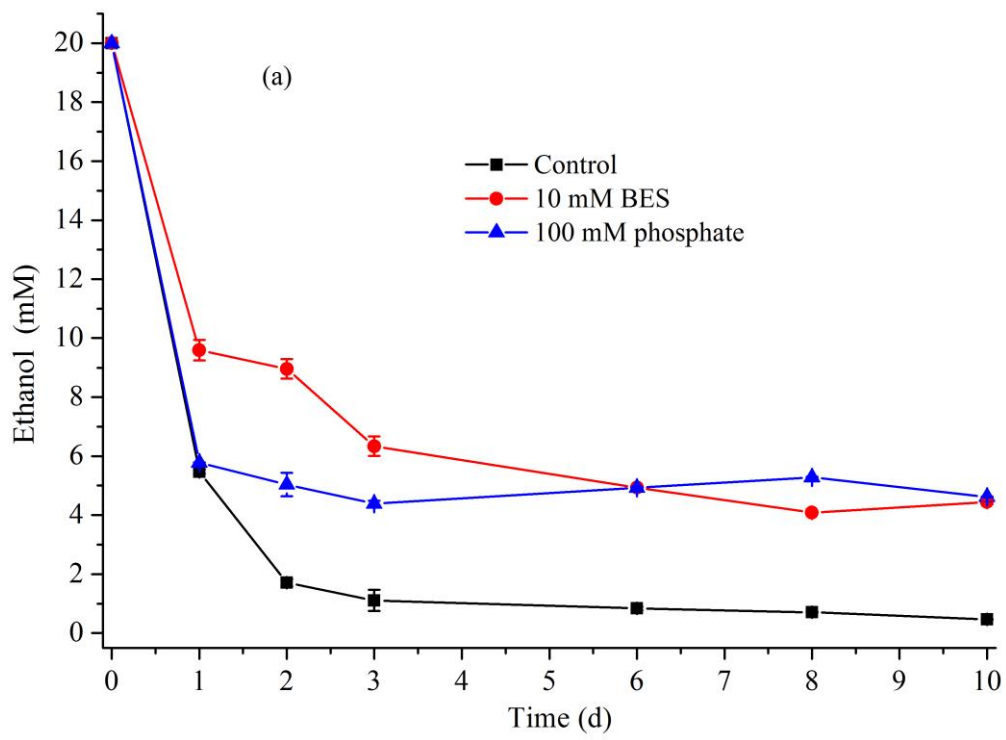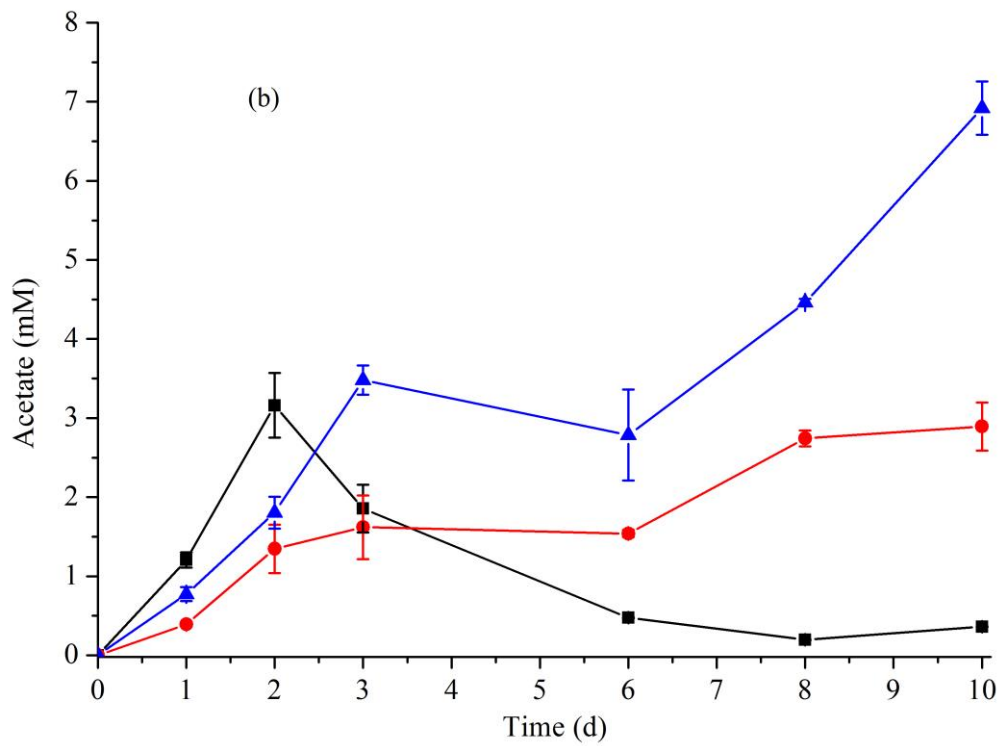

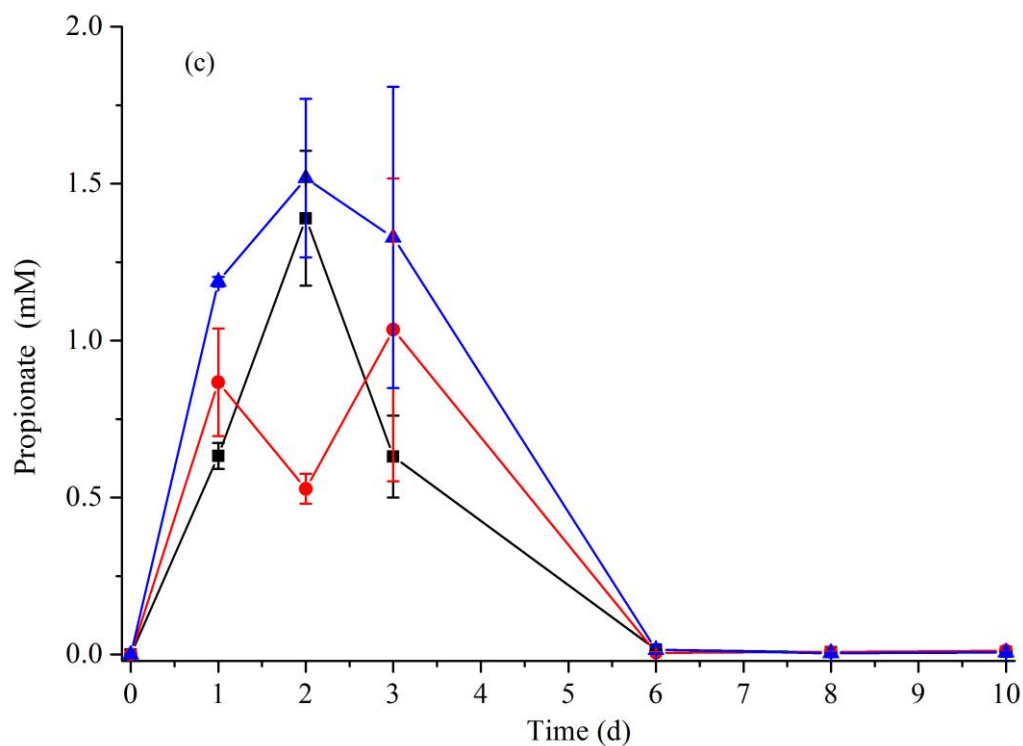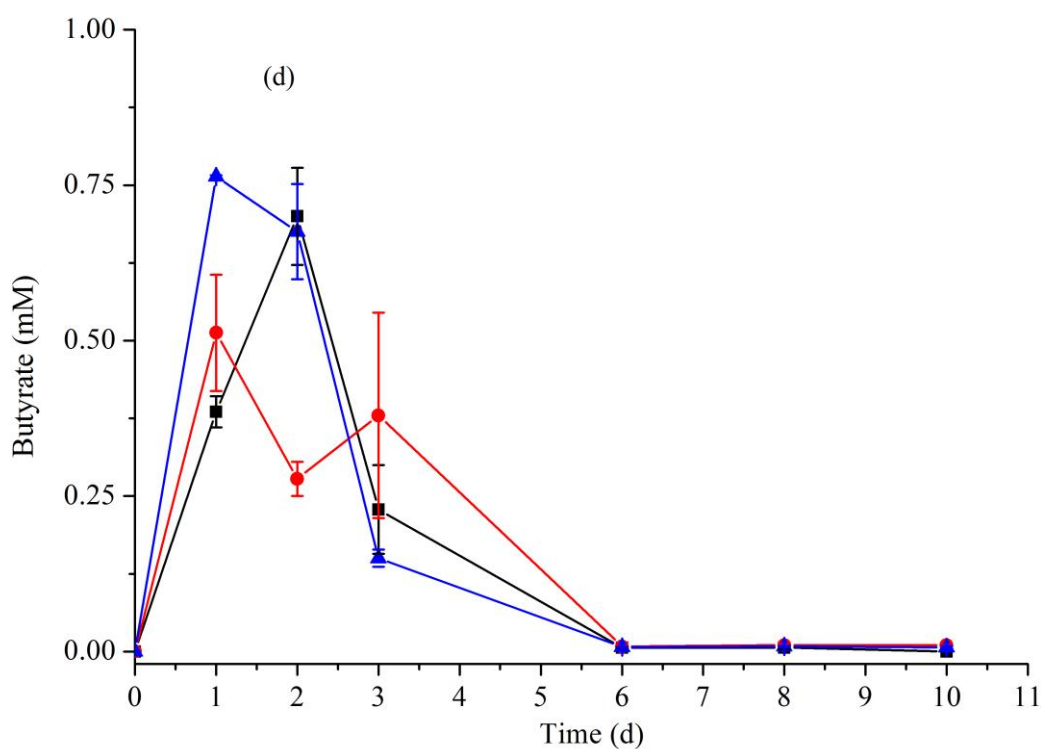

**Supplementary Figure S5. Changes of ethanol and volatile fatty acids in the inhibitor-added cultures and the unamended control.** The following concentrations were determined: (a) Ethanol; (b) Acetate; (c) Propionate and (d) n-Butyrate. Propionate and n-butyrate were produced and then were degraded in all experimental groups. The addition of BES or phosphate resulted in significant acetate accumulation at the end of incubation.

**Supplementary tables****Supplementary Table S1.** Description of inhibition experimental groups.

| Group | Treatment        |
|-------|------------------|
| I     | PEM-HZ control   |
| II    | 100 mM phosphate |
| III   | 10 mM BES        |

**Supplementary Table S2.** Comparison of the richness and diversity of 16S rRNA gene libraries based on 0.03 distance irrespective of the non-specific amplification sequences.

|          | OTUs | Coverage (%) | CHAO1 richness estimation | Shannon diversity |
|----------|------|--------------|---------------------------|-------------------|
| Bacteria |      |              |                           |                   |
| PEC-HZ   | 725  | 96.2         | 829                       | 3.53              |
| PEM-HZ   | 496  | 96.7         | 661                       | 3.85              |
| Archaea  |      |              |                           |                   |
| PEC-HZ   | 123  | 99.3         | 152                       | 2.25              |
| PEM-HZ   | 95   | 99.5         | 152                       | 0.95              |
